# Supplementary material
Source: PubMed Central journal article supplement (PMC9839643)

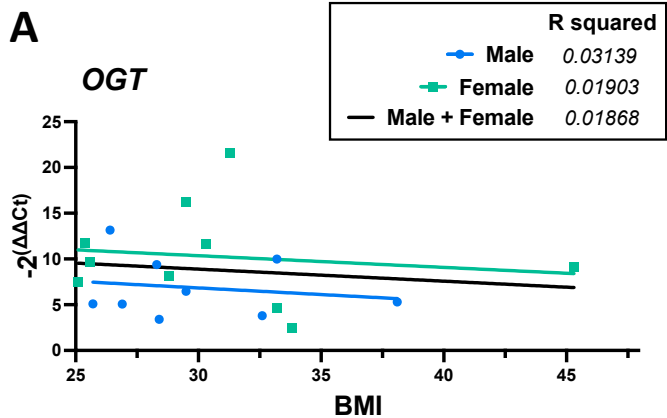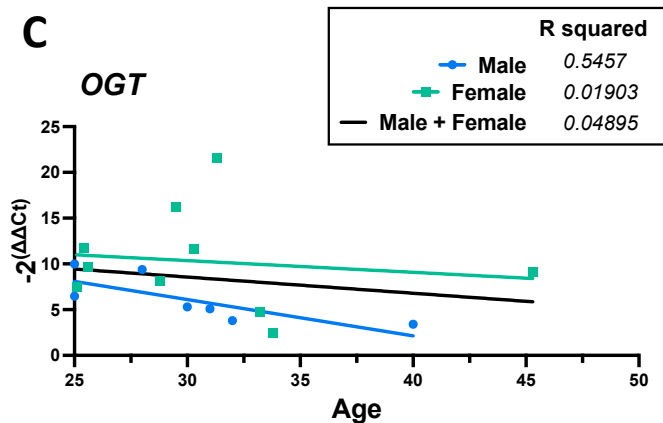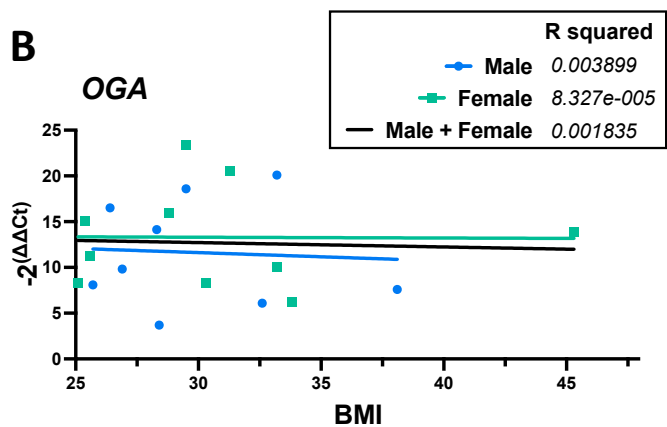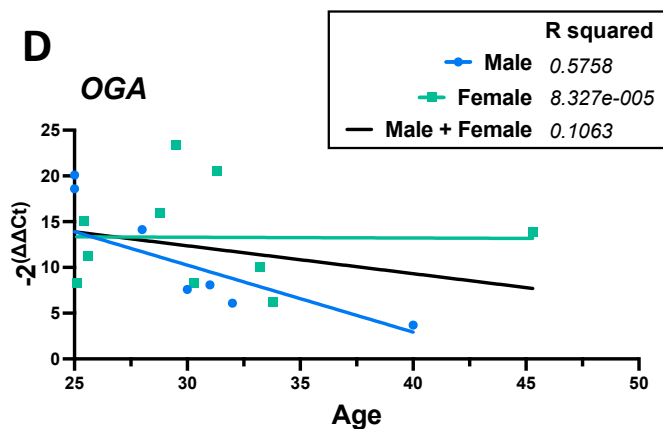

Supplement: NIHMS1853154-supplement-1.pdf [file NIHMS1853154-supplement-1.pdf]

PreE

105

28

4422

siOGT

21%

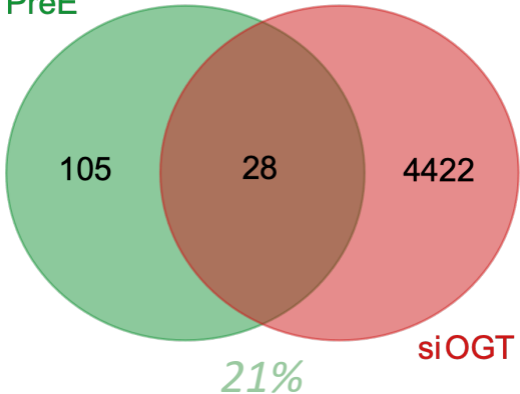

Supplement: NIHMS1853154-supplement-2.pdf [file NIHMS1853154-supplement-2.pdf]

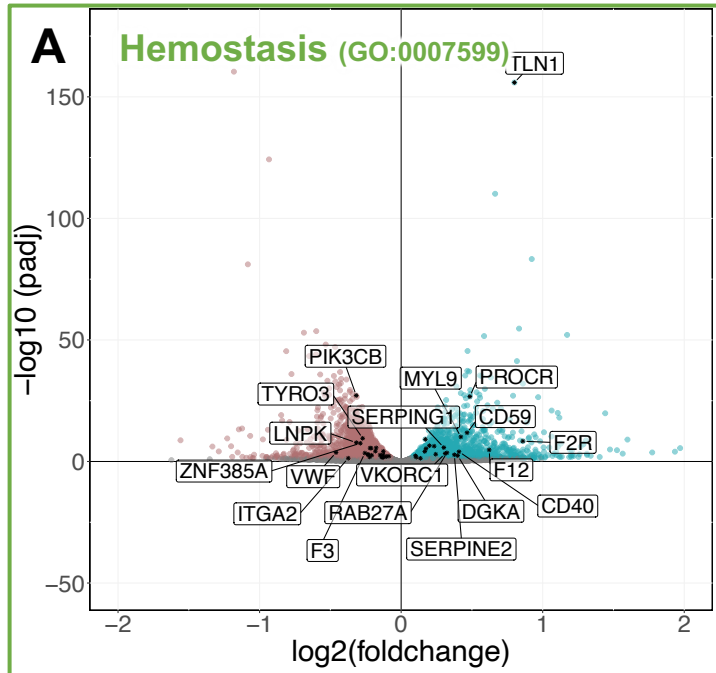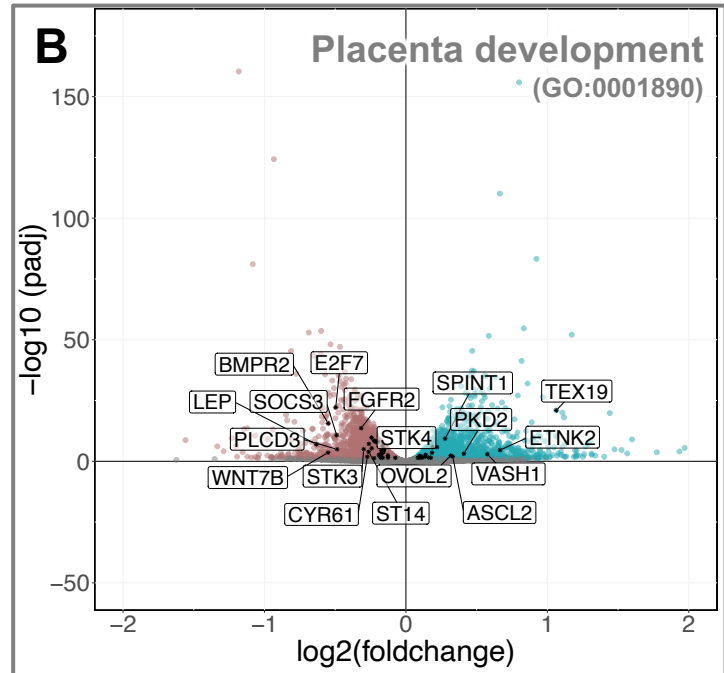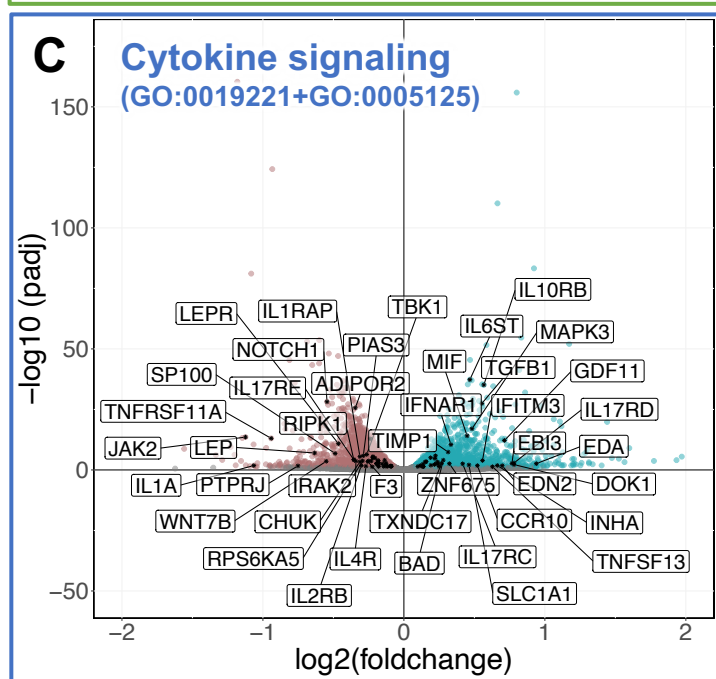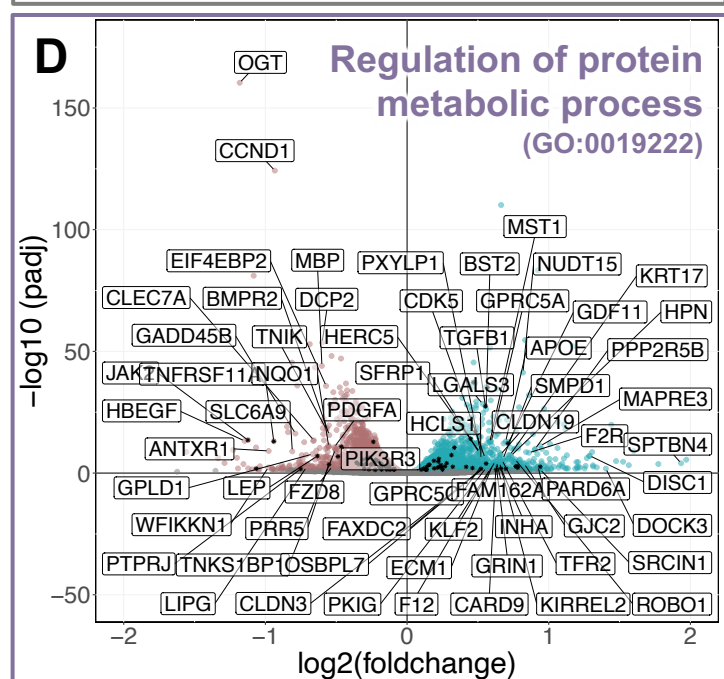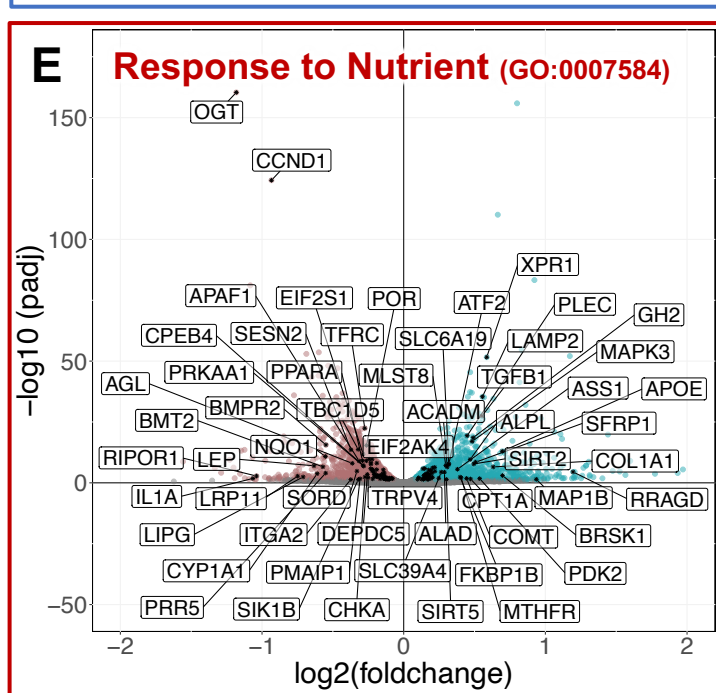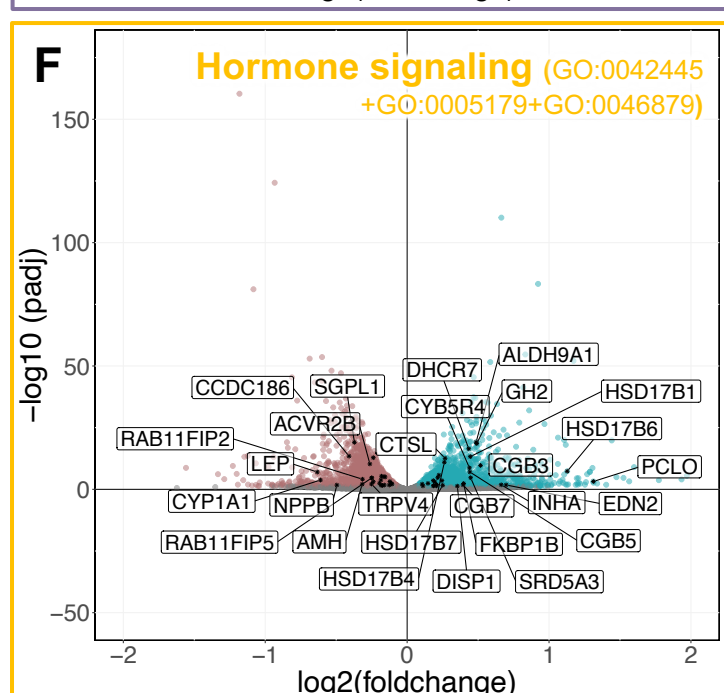

Supplement: NIHMS1853154-supplement-3.pdf [file NIHMS1853154-supplement-3.pdf]

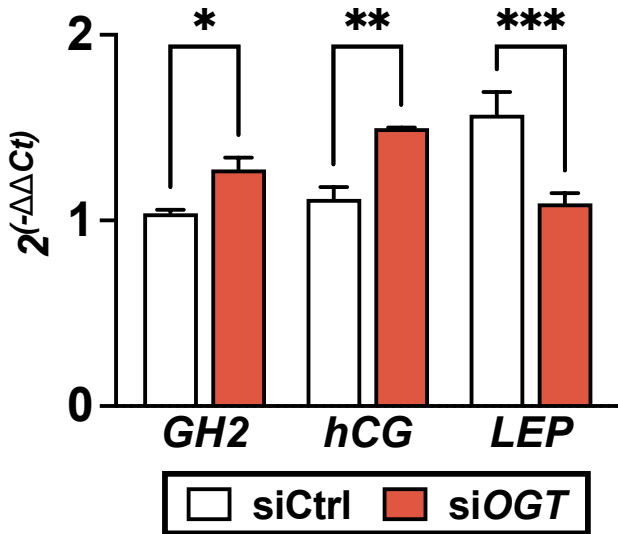

Supplement: NIHMS1853154-supplement-4.pdf [file NIHMS1853154-supplement-4.pdf]

A

*CYP19A1*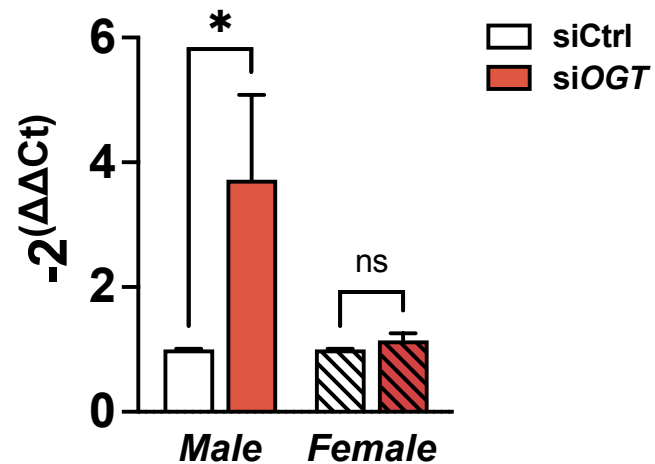

B

*LGALS*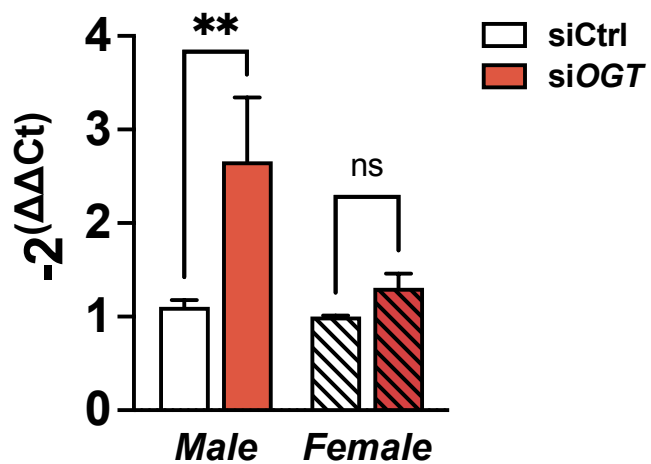

C

*GCM1*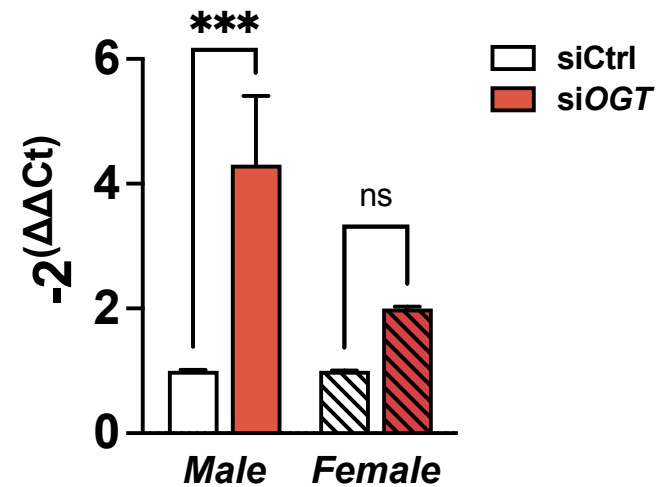

D

Phase contrast

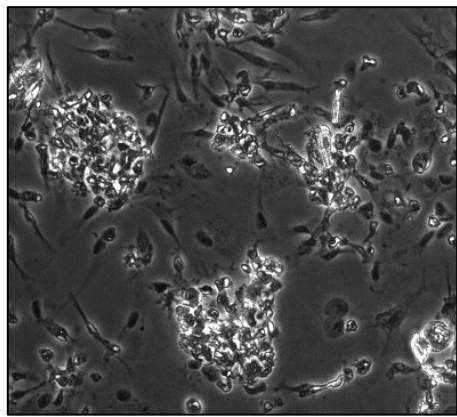

DAPI

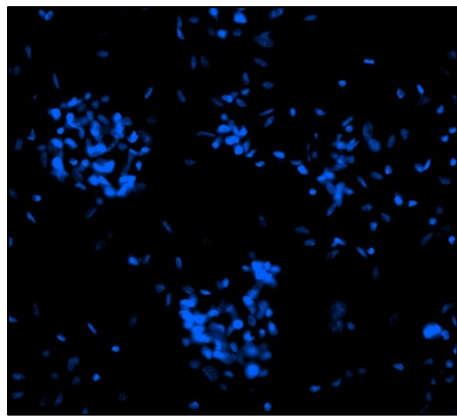

Cytokeratin 7

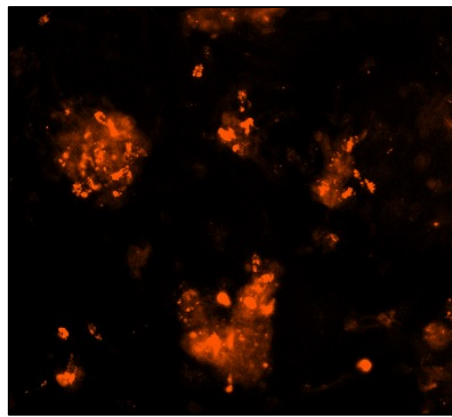

Merge

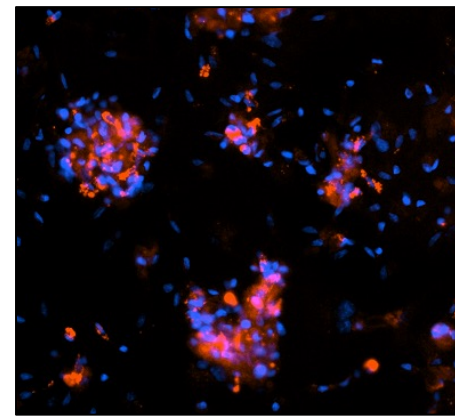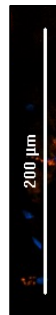

Supplement: NIHMS1853154-supplement-5.pdf [file NIHMS1853154-supplement-5.pdf]
